# Supplementary material for: Primary care physician knowledge, attitudes, and diagnostic testing practices for norovirus and acute gastroenteritis
Source: PubMed Central journal article supplement (PMC6959576; doi:10.1371/journal.pone.0227890), 2020-01-14

# S1 Fig. Additional factors associated with likelihood of stool diagnostic testing for acute gastroenteritis, by specialty.

\*p<0.01 for differences between specialties

Peds=Pediatricians; FM=Family Medicine; GIM=General Internal Medicine

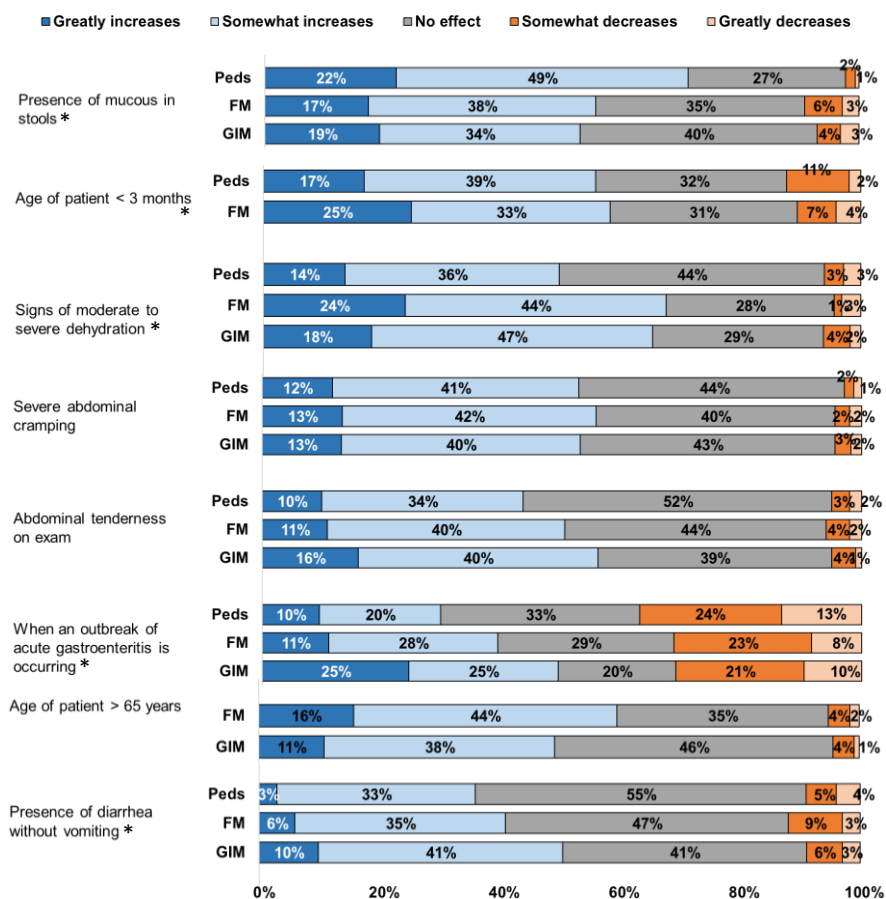

Supplement: pone.0227890.s002.pdf [file pone.0227890.s002.pdf]
